# Supplementary material
Source: MDPI journal article supplement (https://www.mdpi.com/2073-4441/10/2/159)
Supplement: s1 [file s1]

S1 Table: Physical characteristics of a range of water sources in the study area. Two to three measurements were taken during an intensive operation period from 13 January 2017 to 04 February 2017 in the wet season and three to four measurements from 05 June 2016 to 15 July 2016 in the dry season. The median measurement of the values is reported here. Ephemeral rivers that do not flow all the way into the valley are indicated (*) in the dry season.

| Sources | | Wet | | Dry | | Wet | | Dry | | Wet | | | Dry | |
| --- | --- | --- | --- | --- | --- | --- | --- | --- | --- | --- | --- | --- | --- | --- |
|  | | pH | | pH | | Turbidity (NTU) | | Turbidity (NTU) | | EC (µs/cm) | | | EC (µs/cm) | |
| MT | | 7.3 | | 8.7 | | 4 | | 1 | | 47 | | | 70 | |
| MD | | 6.9 | | 8.6 | | 14 | | 2 | | 34 | | | 62 | |
| MU | | 6.9 | | 5.9 | | 4 | | 4 | | 23 | | | 55 | |
| TB | | 5.6 | | * | | 3 | | * | | 26 | | | * | |
| MA | | 5.5 | | * | | 1 | | * | | 27 | | | * | |
| PF | | 6.0 | | * | | 1 | | * | | 24 | | | * | |
| TH | | 6.4 | | * | | 8 | | * | | 30 | | | * | |
| IR | | 7.2 | | 6.7 | | 1 | | 0 | | 29 | | | 40 | |
| CA | | 6.4 | | 5.8 | | 4 | | 11 | | 24 | | | 8 | |
| CB | | 6.4 | | 7.2 | | 14 | | 0 | | 24 | | | 68 | |
| CC | | 6.8 | | 6.4 | | 15 | | 1 | | 74 | | | 77 | |
| TS | | 6.1 | | 6.5 | | 6 | | 1 | | 104 | | | 120 | |
| OS | | 5.6 | | 6 | | 1 | | 3 | | 69 | | | 73 | |
| LS | | 6.3 | | 7.1 | | 5 | | 3 | | 82 | | | 103 | |
| CR | | 6.7 | | 6.9 | | 15 | | 21 | | 204 | | | 285 | |
| CT | | 7.1 | | 7.3 | | 1 | | 1 | | 405 | | | 402 | |
| MB | | 7.5 | | * | | 111 | | * | | 163 | | | * | |
| PS | | * | | 5.4 | | * | | 1 | | | * | | 54 | |
| WHO | | nl | | nl | | nl | | nl | | nl | | | nl | |
| SANS | | 5 to 9.7 (operational) | | 5 to 9.7 (operational) | | 1 (operational) 5 (aesthetic) | | 1(operational) 5 (aesthetic) | | 17000 (aesthetic) | | | 17000 (aesthetic) | |

S2 Table: Membrane filtration results for *E. coli* and total coliforms. South African regulation (SANS 241:1-2015) set the limit of 0 CFU/100 mL for *E. coli* and 10 CFU/100 mL for total coliforms. Ephemeral rivers that do not flow all the way into the valley are indicated (*) in the dry season.

| Sources | Wet | Dry | Wet | Dry | |
| --- | --- | --- | --- | --- | --- |
|  | E. coli  (cfu/100 mL) | E. coli  (cfu/100 mL) | Total Coliform  (cfu/100 mL) | Total coliform (cfu/100 mL) | |
| MT | 0 | 0 | 10 | 0 |
| MD | 100 | 74 | 11800 | 7600 |
| MU | 300 | 3 | 10700 | 5000 |
| TB | 140 | * | 30000 | * |
| MA | 98 | * | 30000 | * |
| PF | 1900 | * | 31900 | * |
| TH | 1200 | * | 31000 | * |
| IR | 2200 | 11 | 32200 | 178 |
| CA | 300 | 1 | 11900 | 89 |
| CB | 66 | 0 | 10100 | 45 |
| CC | 200 | 18 | 13200 | 2000 |
| TS | 12 | 0 | 2600 | 49 |
| OS | 6 | 0 | 400 | 130 |
| LS | 800 | 0 | 23600 | 271 |
| CR | 7 | 0 | 11600 | 2 |
| CT | 0 | 0 | 152 | 52 |
| MB | 200 | * | 30000 | * |
| PS | * | 0 | * | 42 |
| WHO | 0 | 0 | indicator only | indicator only |
| SANS | 0  (acute health) | 0  (acute health) | 10  (operational) | 10 (operational) |

S3 Table: Anions concentration (mg/L) in various water sources within the study area, bdl and NA, NQ represent below detection limit, no available data and not quantified. Ephemeral rivers that do not flow all the way into the valley are indicated (*) in the dry season. Sources: WHO and SANS represent, World Health Organization and South African National Standards.

| Sources | Anions (mg/L) | | | | | | | | | | | |
| --- | --- | --- | --- | --- | --- | --- | --- | --- | --- | --- | --- | --- |
|  | F-  wet | F- dry | Br-  wet | Br-  dry | SO42- wet | SO42- dry | NO3- wet | NO3- dry | PO43- wet | PO43- dry | Cl- wet | Cl- dry |
| MT | 1.33 | bdl | 5.32 | 11.09 | 2.8 | bdl | bdl | bdl | bdl | 3.95 | 21.3 | 58.57 |
| MD | 1.29 | bdl | bdl | 5.41 | 3.35 | bdl | bdl | bdl | bdl | bdl | 10.93 | 36.99 |
| MU | # | bdl | # | 4.84 | # | bdl | # | bdl | # | bdl | # | 31.54 |
| TB | 1.33 | * | # | * | 2.95 | * | bdl | * | 3.92 | * | bdl | * |
| MA | 1.31 | * | # | * | 3.63 | * | bdl | * | bdl | * | 19.24 | * |
| PF | 1.29 | * | 3.23 | * | 3.79 | * | bdl | * | bdl | * | 23.04 | * |
| TH | 1.3 | bdl | 4.46 | 4.86 | 3.65 | 0.63 | bdl | bdl | bdl | bdl | 20.65 | 33.67 |
| IR | 1.29 | bdl | 3.85 | 6.54 | 3.86 | 0.82 | bdl | bdl | bdl | 0.56 | 19.95 | 34.43 |
| CA | 1.29 | bdl | 2.09 | 11.83 | 3.05 | bdl | bdl | bdl | bdl | 1.78 | 10.09 | 54.99 |
| CB | # | bdl | # | 5.11 | # | bdl | # | bdl | # | bdl | # | 53.72 |
| CC | 1.29 | bdl | 1.99 | 7.61 | 3.33 | bdl | bdl | bdl | bdl | bdl | 9.99 | 40.93 |
| TS | 1.3 | # | 4.08 | # | 2.51 | # | 9.72 | # | bdl | # | 28.25 | # |
| OS | 1.29 | 0.47 | 2.25 | 10.06 | 3.3 | 1.3 | 5.56 | bdl | bdl | 3.25 | 12.78 | 94.35 |
| LS | 1.29 | 0.82 | 3.33 | 24.19 | 3.88 | 1.65 | 5.21 | bdl | bdl | 7.86 | 11.27 | 85.15 |
| CR | # | 0.33 | # | 4.96 | # | 0.9 | # | 2.47 | # | 0 | # | 52.56 |
| CT | 1.48 | * | 1.35 | * | 2.69 | * | 5.35 | * | 3.99 | * | 10 | * |
| MB | # | * | # | * | # | * | # | * | # | * | # | * |
| PS | * | bdl | * | 1.93 | * | bdl | * | 0.64 | * | bdl | * | 44.63 |
| WHO | 1.5 | 1.5 | nl | nl | nl | nl | 50 | 50 | nl | nl | nl | nl |
| SANS | 1.5 | bdl | nl | 11.09 | 250 | 250 | 50 | 50 | nl | nl | 300 | 300 |

S4 Table: Major metal concentrations (mg/L) in various water sources around the study area, where bdl represent below detection limit. WHO and SANS represent, World Health Organization and South African National Standards. NA represent no available date.

| Sources | Metals (mg/L) | | | | | | | | | | | | | | |
| --- | --- | --- | --- | --- | --- | --- | --- | --- | --- | --- | --- | --- | --- | --- | --- |
|  | Na  wet | Na dry | Ca  wet | Ca  dry | K  wet | K dry | | Mg wet | Mg dry | S2- wet | S2- dry | Si wet | Si  dry | P  wet | P  dry |
| MT | 4.56 | 5.66 | 5.16 | 5.16 | 0.32 | | 1.07 | 1.27 | 2.92 | 0.37 | 0.34 | 2.92 | 4.33 | bdl | 0.04 |
| MD | 4.46 | 5.78 | 2.15 | 3.16 | 0.35 | | 0.27 | 1.67 | 2.8 | 0.3 | 0.27 | 3.61 | 4.39 | bdl | 0.01 |
| MU | 3.08 | 4.54 | 1.44 | 3.34 | 0.6 | | 0.08 | 1 | 2.97 | 0.34 | 0.25 | 2.16 | 3.58 | 0.02 | 0 |
| TB | 3.79 | * | 0.72 | * | 0.52 | | * | 0.56 | * | 0.28 | * | 1.88 | * | bdl | * |
| MA | 4.15 | * | 0.6 | * | 0.46 | | * | 0.63 | * | 0.24 | * | 1.87 | * | bdl | * |
| PF | 2.84 | * | 0.66 | * | 0.59 | | * | 0.51 | * | 0.29 | * | 1.29 | * | bdl | * |
| TH | 4.55 | * | 1.04 | * | 0.81 | | * | 1.02 | * | 0.34 | * | 2.15 | * | bdl | * |
| IR | 4.46 | 3.47 | 1.07 | 0.65 | 0.98 | | 0.09 | 0.94 | 1.35 | 0.33 | 0.18 | 2.07 | 3.25 | bdl | 0 |
| CA | 4.09 | 2.96 | 1.35 | 0.49 | 0.61 | | 0.03 | 0.86 | 0.69 | 0.26 | 0.12 | 2.42 | 3.07 | 0.02 | 0 |
| CB | 6.07 | 4.6 | 1.83 | 3.03 | 0.17 | | 0.18 | 4.21 | 5.36 | 0.2 | 0.08 | 6.08 | 5.18 | 0.01 | 0.01 |
| CC | 3.27 | 4.92 | 0.59 | 4.81 | 0.16 | | 0.04 | 0.64 | 2.31 | 0.15 | 0.4 | 2.08 | 5.14 | bdl | 0.01 |
| TS | 6.78 | 6.24 | 7.05 | 6.51 | 0.13 | | bdl | 4.49 | 4.86 | 0.1 | 0.08 | 12.13 | 12.14 | 0.01 | 0.01 |
| OS | 5.53 | 5.67 | 2.9 | 2.76 | 0.03 | | bdl | 3.2 | 3.22 | 0.04 | 0.04 | 4.12 | 4.13 | bdl | 0 |
| LS | 7.76 | 7.08 | 5.13 | 3.53 | 0.4 | | 0.02 | 3.91 | 3.04 | 0.12 | 0.15 | 10.65 | 9.83 | bdl | 0.01 |
| CR | 13.9 | 12.7 | 18.93 | 18.23 | 0.11 | | 0.06 | 14.59 | 15.5 | 0.78 | 0.41 | 18.12 | 17.06 | bdl | 0.01 |
| CT | 41.0 | 36.2 | 33.83 | 33.43 | 1.22 | | 1.04 | 6.8 | 7.45 | 0.52 | 0.55 | 15.82 | 16.77 | 0.12 | 0.13 |
| MB | 16.2 | * | 19.91 | * | 0.4 | | * | 13.71 | * | 0.23 | * | 22.5 | * | 0.01 | * |
| PS | * | 7.13 | * | 1.09 | * | | 0.18 | * | 1.07 | * | 0.15 | * | 5.46 | * | 0.01 |
| WHO | nl | nl | nl | nl | nl | | nl | nl | nl | nl | nl | nl | nl | nl | nl |
| SANS | 200 | 200 | nl | nl | nl | | nl | nl | nl | nl | nl | nl | nl | nl | nl |

S5 Table: Trace metal concentrations (μg/L) in various water sources around the area of study, where bdl and NA represent below detection limit and No available guideline value. WHO and SANS represent, World Health Organization and South African National Standards.

| Metals  (µg/L) | CR  dry | CR  wet | CT dry | CT  wet | MU  dry | MU  wet | MD  dry | MD  wet | IR  dry | IR  wet | PS  dry | PS wet | WHO  [21] | SANS  [18] |
| --- | --- | --- | --- | --- | --- | --- | --- | --- | --- | --- | --- | --- | --- | --- |
| Li | 0.73 | 1.53 | 2.70 | 1.21 | 0.19 | bdl | bdl | 0.14 | 0.20 | bdl | bdl | bdl | NA | NA |
| Be | 0.01 | bdl | bdl | 0.05 | bdl | bdl | 0.02 | bdl | bdl | 0.00 | 0.02 | 0.02 | NA | NA |
| B | 19.14 | 13.48 | 13.79 | 14.44 | 8.05 | 6.58 | 8.18 | 8.56 | 5.71 | 9.16 | 5.68 | 9.38 | NA | 2400 |
| Al | 5.12 | 39.18 | 5.56 | 25.10 | 27.93 | 145.67 | 80.42 | 83.62 | 23.51 | 97.83 | 34.84 | 80.02 | NA | 300 |
| V | 4.78 | 6.72 | 8.87 | 0.81 | 0.71 | 0.78 | 0.98 | 0.76 | 0.33 | 0.47 | 0.37 | 0.30 | NA | 100 |
| Cr | 3.63 | 3.91 | 3.84 | 3.63 | 3.93 | 4.27 | 4.22 | 4.10 | 3.83 | 6.70 | 3.80 | 5.63 | 50 | 50 |
| Mn | 5.69 | 8.37 | 1.48 | 2.55 | 56.20 | 41.67 | 76.05 | 52.89 | 3.04 | 4.44 | 27.28 | 12.80 | NA | 100/400 |
| Fe | 741.75 | 1268.27 | 87.91 | 65.00 | 1262.11 | 436.00 | 975.25 | 696.56 | 142.50 | 113.94 | 446.84 | 85.71 | NA | 300/2000 |
| Co | 0.05 | 0.15 | 0.04 | 0.09 | 0.60 | 0.68 | 0.81 | 0.52 | 0.13 | 0.31 | 2.26 | 0.34 | NA | NA |
| Ni | 3.29 | 3.95 | 2.03 | 2.89 | 2.21 | 3.85 | 3.08 | 5.84 | 2.57 | 5.53 | 4.92 | 4.20 | 70 | 70 |
| Cu | 55.35 | 12.15 | 0.25 | 13.02 | 0.14 | 7.94 | 3.95 | 15.60 | 2.06 | 9.84 | 4.21 | 5.35 | 2000 | 2000 |
| Zn | 177.15 | 61.32 | 13.81 | 67.90 | 0.96 | 69.07 | 35.54 | 13.47 | 3.47 | 67.10 | 4.20 | 35.74 | NA | 5000 |
| As | 0.10 | 1.20 | 0.15 | 1.33 | 0.06 | 1.33 | 0.57 | 0.08 | 0.04 | 0.39 | 0.05 | 0.13 | 10 | 10 |
| Se | 0.11 | 0.08 | 0.11 | 0.06 | 0.03 | 0.05 | 0.06 | 0.02 | 0.02 | 0.03 | 0.02 | 0.04 | 40 | 40 |
| Sr | 30.80 | 35.00 | 57.49 | 93.79 | 12.19 | 6.10 | 10.99 | 15.46 | 5.98 | 6.70 | 12.85 | 7.26 | NA | NA |
| Mo | 0.14 | 0.14 | 0.16 | 0.34 | 0.12 | 0.15 | 0.14 | 0.14 | 0.12 | 0.15 | 0.13 | 0.11 | NA | NA |
| Cd | 0.05 | 0.02 | 0.00 | 0.04 | bdl | 0.06 | 0.02 | 0.03 | 0.00 | 0.11 | 0.01 | 0.06 | 3 | 3 |
| Sb | 0.01 | 0.25 | 0.02 | 0.21 | 0.00 | 1.02 | 0.78 | 0.25 | 0.03 | 0.64 | 0.07 | 0.18 | 20 | 20 |
| Hg | 0.01 | 0.01 | 0.01 | 0.02 | 0.01 | 0.00 | 0.00 | 0.01 | 0.01 | 0.04 | 0.01 | 0.03 | 6 | 6 |
| Pb | 1.31 | 1.33 | 0.23 | 1.40 | 0.20 | 1.61 | 0.76 | 0.91 | 0.41 | 1.58 | 0.39 | 0.89 | 10 | 10 |
| Ba | bdl | 8.25 | bdl | 47.23 | bdl | 7.60 | 9.81 | 0.01 | bdl | 7.47 | 0.02 | 9.91 | 700 | 700 |

S5 Table continued

| Metals  (µg/L) | CA  dry | CA  wet | CB  dry | CB  wet | CC  dry | CC  wet | TS dry | TS  wet | MB  wet | MT dry | MT wet | WHO [21] | SANS [18] |
| --- | --- | --- | --- | --- | --- | --- | --- | --- | --- | --- | --- | --- | --- |
| Li | 0.24 | bdl | bdl | bdl | bdl | bdl | 0.79 | bdl | 1.48 | 0.20 | bdl | NA | NA |
| Be | bdl | 0.05 | 0.01 | 0.00 | bdl | 0.00 | 0.01 | 0.05 | 0.02 | bdl | 0.00 | NA | NA |
| B | 4.59 | 8.84 | 5.01 | 4.69 | 2.99 | 6.33 | 8.00 | 6.19 | 14.50 | 9.95 | 7.02 | NA | 2400 |
| Al | 27.81 | 344.28 | 8.40 | 437.95 | 23.40 | 90.51 | 9.79 | 40.54 | 113.91 | 271.25 | 0.69 | NA | 300 |
| V | 0.23 | 0.97 | 0.96 | 8.21 | 1.40 | 0.92 | 0.74 | 1.08 | 10.57 | 2.58 | 0.57 | NA | 100 |
| Cr | 3.76 | 4.60 | 3.83 | 5.21 | 3.82 | 4.33 | 3.95 | 3.97 | 3.90 | 4.62 | 4.06 | 50 | 50 |
| Mn | 2.69 | 29.63 | 3.30 | 50.55 | 2.21 | 3.63 | 1.19 | 2.80 | 33.23 | 17.92 | 45.68 | NA | 100/400 |
| Fe | 96.64 | 1046.87 | 48.66 | 1354.28 | 81.88 | 115.09 | 35.21 | 63.93 | 126.48 | 253.30 | 210.12 | NA | 300/2000 |
| Co | 0.11 | 0.88 | 0.08 | 1.71 | 0.11 | 0.18 | 0.04 | 0.11 | 0.55 | 1.07 | 0.21 | NA | NA |
| Ni | 2.85 | 4.16 | 3.09 | 4.76 | 2.96 | 2.66 | 3.03 | 3.33 | 3.45 | 9.83 | 2.78 | 70 | 70 |
| Cu | 2.01 | 8.47 | 0.12 | 4.82 | 1.81 | 2.27 | 1.55 | 2.93 | 1.99 | 75.31 | 3.70 | 2000 | 2000 |
| Zn | 3.51 | 112.42 | 2.14 | 44.88 | 3.09 | 34.14 | 2.17 | 63.79 | 1955.39 | 88.08 | 40.73 | NA | 5000 |
| As | 0.03 | 0.68 | 0.03 | 0.57 | 0.13 | 0.55 | 0.05 | 2.57 | 0.49 | 0.19 | 0.69 | 10 | 10 |
| Se | 0.01 | 0.06 | 0.02 | 0.04 | 0.04 | 0.05 | 0.03 | 0.04 | 0.04 | 0.02 | 0.05 | 40 | 40 |
| Sr | 3.58 | 5.47 | 15.77 | 12.18 | 24.75 | 4.41 | 23.90 | 23.40 | 51.64 | 19.65 | 18.12 | NA | NA |
| Mo | 0.12 | 0.14 | 0.14 | 0.13 | 0.20 | 0.13 | 0.15 | 0.13 | 0.17 | 0.16 | 0.15 | NA | NA |
| Cd | 0.00 | 0.09 | 0.00 | 0.03 | 0.01 | 0.02 | 0.00 | 0.03 | 0.01 | 0.09 | 0.02 | 3 | 3 |
| Sb | 0.05 | 0.24 | 0.00 | 0.22 | 0.04 | 0.13 | 0.02 | 0.49 | 0.21 | 0.38 | 6.36 | 20 | 20 |
| Hg | 0.02 | 0.01 | 0.01 | 0.01 | 0.01 | 0.01 | 0.01 | bdl | bdl | 0.02 | bdl | 6 | 6 |
| Pb | 0.35 | 1.64 | 0.24 | 0.99 | 0.34 | 0.54 | 0.28 | 1.01 | 0.57 | 3.79 | 0.25 | 10 | 10 |
| Ba | bdl | 7.52 | 0.01 | 13.59 | bdl | 5.03 | 0.01 | 8.63 | 10.79 | 0.01 | 0.78 | 700 | 700 |
